# Supplementary material for: Organ Donation in Switzerland - An Analysis of Factors Associated with Consent Rate
Source: PLoS One. 2014 Sep 10;9(9):e106845. doi: 10.1371/journal.pone.0106845 (PMC4160222; doi:10.1371/journal.pone.0106845)
Supplement: Appendix S1 — Results of multivariable analysis of selected predictors with imputation of missing points. (XLSX) [file pone.0106845.s001.xlsx]

## Sheet: WebAppendix1
Variable		Odds ratio (MI)	p (MI)
Caucasian ethnicity		1.33 (0.29–6.03)	0.71
Swiss nationality		3.16 (1.52–6.58)	0.002
Parent approached for consent		1.74 (0.95–3.20)	0.074
In-house neurologist permanently available		1.16 (0.44–3.09)	0.77
Request before brain death declared		1.79 (0.89–3.60)	0.1
Hospital in German language area		0.28 (0.14–0.57)	<0.001
Hospital size			0.17
	Medium	1.56 (0.51–4.77)
	Large	0.75 (0.27–2.10)
((TABLE LEGEND))
Odds ratios (95% confidence intervals) for variables selected from univariable analyses. Variables with p <0.2 in the univariable analysis were selected. Results are presented for an analysis using 20 imputations (MI) for missing data points. For hospital sizes odds ratios to the reference level Small are given.
